# Supplementary material for: Antimicrobial activity of α-mangostin against Staphylococcus species from companion animals in vitro and therapeutic potential of α-mangostin in skin diseases caused by S. pseudintermedius
Source: Front Cell Infect Microbiol. 2023 May 25;13:1203663. doi: 10.3389/fcimb.2023.1203663 (PMC10248440; doi:10.3389/fcimb.2023.1203663)
Supplement: Supplementary file 3 [file Table_2.xlsx]

## Sheet: Table S2
Table S2. Differentially expressed genes in S. pseudintermedius ATCC 49051 treated with 0.7x MIC of α-mangostin
Gene_id	Chromosome	Start	End	Base mean	log2 fold change	lfcSE	Stat	p value	q_value	Significance	Gene	Product	PSTORb
JC286_RS09395	NZ_CP065921.1	1973154	1974818	38581.7	2.258	0.170797	13.2203	6.69623e-40	6.56812e-38	Yes	JC286_RS09395	peptide ABC transporter substrate-binding protein	Cell wall
JC286_RS01820	NZ_CP065921.1	452397	454118	10742.8	2.21256	0.211166	10.4778	1.09255e-25	5.35825e-24	Yes	JC286_RS01820	ABC transporter substrate-binding protein	Cell wall
JC286_RS12075	NZ_CP065921.1	2528827	2530779	3464.41	-1.34902	0.186296	-7.24126	4.4454e-13	1.09009e-11	Yes	JC286_RS12075	LPXTG-anchored surface protein SpsN	Cell wall
JC286_RS06985	NZ_CP065921.1	1455889	1457154	33714.9	5.0329	0.226739	22.1969	3.68217e-109	2.76899e-106	Yes	lysA	diaminopimelate decarboxylase	Cytoplasm
JC286_RS06990	NZ_CP065921.1	1457155	1458234	29216.7	4.60476	0.201312	22.8737	8.48775e-116	9.57418e-113	Yes	alr	Alanine racemase	Cytoplasm
JC286_RS07000	NZ_CP065921.1	1459570	1460289	29342.2	4.50663	0.207809	21.6864	2.75845e-104	1.55577e-101	Yes	dapD	2,3,4,5-tetrahydropyridine-2,6-dicarboxylate N-acetyltransferase	Cytoplasm
JC286_RS07015	NZ_CP065921.1	1461910	1462896	44362.1	4.3918	0.18941	23.1868	6.18733e-119	1.39586e-115	Yes	JC286_RS07015	aspartate-semialdehyde dehydrogenase	Cytoplasm
JC286_RS06995	NZ_CP065921.1	1458231	1459385	17252.3	4.35756	0.201929	21.5797	2.78702e-103	1.25751e-100	Yes	JC286_RS06995	M20 family metallopeptidase	Cytoplasm
JC286_RS07005	NZ_CP065921.1	1460309	1461031	23177.9	4.24869	0.207743	20.4516	5.80927e-93	2.18429e-90	Yes	JC286_RS07005	4-hydroxy-tetrahydrodipicolinate reductase	Cytoplasm
JC286_RS07010	NZ_CP065921.1	1461028	1461906	26103.8	4.13006	0.212683	19.4189	5.34151e-84	1.72149e-81	Yes	JC286_RS07010	4-hydroxy-tetrahydrodipicolinate synthase	Cytoplasm
JC286_RS07245	NZ_CP065921.1	1522038	1523390	1679.92	3.29605	0.21435	15.377	2.33574e-53	4.05341e-51	Yes	JC286_RS07245	aspartate kinase	Cytoplasm
JC286_RS00910	NZ_CP065921.1	843165	844169	1303.37	3.19488	0.249397	12.8104	1.43346e-37	1.19774e-35	Yes	ilvC	ketol-acid reductoisomerase	Cytoplasm
JC286_RS07245	NZ_CP065921.1	840565	841614	1025.59	3.15241	0.231586	13.6123	3.38508e-42	3.63654e-40	Yes	leuB	3-isopropylmalate dehydrogenase	Cytoplasm
JC286_RS03720	NZ_CP065921.1	839188	840561	1458.47	3.08377	0.239627	12.869	6.72598e-38	5.83608e-36	Yes	leuC	3-isopropylmalate dehydratase large subunit	Cytoplasm
JC286_RS03705	NZ_CP065921.1	838616	839188	768.485	3.0807	0.269326	11.4386	2.68233e-30	1.59246e-28	Yes	leuD	3-isopropylmalate dehydratase small subunit	Cytoplasm
JC286_RS03725	NZ_CP065921.1	841611	843143	1223.5	3.03877	0.24136	12.5902	2.39083e-36	1.79791e-34	Yes	JC286_RS03725	2-isopropylmalate synthase	Cytoplasm
JC286_RS03735	NZ_CP065921.1	844204	844677	295.175	2.95798	0.365446	8.09417	5.76569e-16	1.56716e-14	Yes	ilvN	acetolactate synthase small subunit	Cytoplasm
JC286_RS00905	NZ_CP065921.1	216736	217683	339.137	2.8374	0.315441	8.99501	2.36201e-19	7.50519e-18	Yes	JC286_RS00905	ABC transporter substrate-binding protein	Cytoplasm
JC286_RS12385	NZ_CP065921.1	2591939	2594182	2001.39	2.71943	0.208168	13.0636	5.31258e-39	4.99383e-37	Yes	metE	5-methyltetrahydropteroyltriglutamate--homocysteine S-methyltransferase	Cytoplasm
JC286_RS10720	NZ_CP065921.1	2250987	2251997	81.8464	2.6981	0.622304	4.33567	1.45317e-05	0.000191716	Yes	sbnB	2,3-diaminopropionate biosynthesis protein SbnB	Cytoplasm
JC286_RS03740	NZ_CP065921.1	844674	846428	1130.83	2.6371	0.286062	9.21864	3.00897e-20	1.01317e-18	Yes	ilvB	biosynthetic-type acetolactate synthase large subunit	Cytoplasm
JC286_RS11790	NZ_CP065921.1	2461218	2461310	63.617	2.56702	0.625935	4.1011	4.1119e-05	0.000512511	Yes	JC286_RS11790	tRNA	Cytoplasm
JC286_RS10945	NZ_CP065921.1	2292202	2292534	927.23	2.54166	0.260556	9.75475	1.76038e-22	6.84727e-21	Yes	JC286_RS10945	PadR family transcriptional regulator	Cytoplasm
JC286_RS00880	NZ_CP065921.1	209994	211508	1885.44	2.53577	0.244629	10.3658	3.54722e-25	1.63317e-23	Yes	JC286_RS00880	acyl--CoA ligase	Cytoplasm
JC286_RS12380	NZ_CP065921.1	2590104	2591945	1608.06	2.5333	0.222468	11.3872	4.84039e-30	2.72998e-28	Yes	JC286_RS12380	bifunctional homocysteine S-methyltransferase/methylenetetrahydrofolate reductase	Cytoplasm
JC286_RS10725	NZ_CP065921.1	2251999	2252976	55.3633	2.51136	0.678404	3.70187	0.000214015	0.00232124	Yes	sbnA	2,3-diaminopropionate biosynthesis protein SbnA	Cytoplasm
JC286_RS00915	NZ_CP065921.1	218608	219120	523.03	2.44234	0.262671	9.29809	1.42986e-20	4.96272e-19	Yes	JC286_RS00915	DUF4242 domain-containing protein	Cytoplasm
JC286_RS00875	NZ_CP065921.1	208746	209957	1488.74	2.40879	0.27407	8.78896	1.50953e-18	4.54066e-17	Yes	JC286_RS00875	acyl-CoA dehydrogenase family protein	Cytoplasm
JC286_RS11795	NZ_CP065921.1	2461377	2462834	4565.13	2.34938	0.27996	8.39185	4.78537e-17	1.36656e-15	Yes	JC286_RS11795	glutamate synthase subunit beta	Cytoplasm
JC286_RS00885	NZ_CP065921.1	846449	848137	1913.2	2.34712	0.193	12.1612	5.00034e-34	3.41841e-32	Yes	ilvD	dihydroxy-acid dehydratase	Cytoplasm
JC286_RS12375	NZ_CP065921.1	2588975	2590150	518.894	2.14397	0.271052	7.90984	2.57717e-15	6.68288e-14	Yes	JC286_RS12375	aminotransferase class I/II-fold pyridoxal phosphate-dependent enzyme	Cytoplasm
JC286_RS00865	NZ_CP065921.1	205235	206416	792.832	2.09316	0.260517	8.03464	9.3854e-16	2.52065e-14	Yes	JC286_RS00865	thiolase family protein	Cytoplasm
JC286_RS09835	NZ_CP065921.1	2063843	2064847	2101.64	1.96919	0.195494	10.0729	7.279e-24	3.09838e-22	Yes	JC286_RS09835	D-2-hydroxyacid dehydrogenase	Cytoplasm
JC286_RS07940	NZ_CP065921.1	1679875	1680483	4323.17	1.96584	0.186453	10.5433	5.45305e-26	2.7338e-24	Yes	JC286_RS07940	orotate phosphoribosyltransferase	Cytoplasm
JC286_RS05425	NZ_CP065921.1	1146568	1147728	1807.13	1.9588	0.218152	8.97907	2.7306e-19	8.55589e-18	Yes	JC286_RS05425	alanine--glyoxylate aminotransferase family protein	Cytoplasm
JC286_RS12370	NZ_CP065921.1	2587876	2588988	286.948	1.93945	0.301066	6.44195	1.17951e-10	2.63462e-09	Yes	JC286_RS12370	PLP-dependent transferase	Cytoplasm
JC286_RS07235	NZ_CP065921.1	1519493	1520557	5877.29	1.92065	0.203619	9.43259	4.00097e-21	1.43273e-19	Yes	JC286_RS07235	threonine synthase	Cytoplasm
JC286_RS07945	NZ_CP065921.1	1680471	1681175	3201.36	1.91738	0.184163	10.4113	2.20198e-25	1.05695e-23	Yes	pyrF	orotidine-5'-phosphate decarboxylase	Cytoplasm
JC286_RS00045	NZ_CP065921.1	11125	12627	8022.18	1.88592	0.198927	9.48048	2.53113e-21	9.21003e-20	Yes	hutH	histidine ammonia-lyase	Cytoplasm
JC286_RS05420	NZ_CP065921.1	1144983	1146578	3620.68	1.86579	0.18977	9.83186	8.20921e-23	3.36727e-21	Yes	JC286_RS05420	phosphoglycerate dehydrogenase	Cytoplasm
JC286_RS07950	NZ_CP065921.1	1681177	1682097	4636.67	1.86487	0.190294	9.79996	1.12631e-22	4.5374e-21	Yes	JC286_RS07950	dihydroorotate dehydrogenase	Cytoplasm
JC286_RS07230	NZ_CP065921.1	1518576	1519493	6623.92	1.81818	0.216424	8.40101	4.42662e-17	1.28032e-15	Yes	JC286_RS07230	homoserine kinase	Cytoplasm
JC286_RS07240	NZ_CP065921.1	1135228	1136937	10285.2	1.78072	0.171626	10.3756	3.20248e-25	1.50517e-23	Yes	acsA	acetate--CoA ligase	Cytoplasm
JC286_RS04105	NZ_CP065921.1	925450	926817	217.949	1.7682	0.347057	5.09484	3.49037e-07	6.05714e-06	Yes	JC286_RS04105	ATP-binding cassette domain-containing protein	Cytoplasm
JC286_RS10705	NZ_CP065921.1	2246261	2247979	240.681	1.64819	0.324431	5.08024	3.76949e-07	6.49158e-06	Yes	JC286_RS10705	siderophore biosynthesis protein SbnE	Cytoplasm
JC286_RS07955	NZ_CP065921.1	1682094	1682858	2571.99	1.61079	0.233805	6.88946	5.60029e-12	1.32992e-10	Yes	JC286_RS07955	dihydroorotate dehydrogenase electron transfer subunit	Cytoplasm
JC286_RS09830	NZ_CP065921.1	2063097	2063822	1534.72	1.54629	0.25704	6.01574	1.79068e-09	3.74054e-08	Yes	aroD	type I 3-dehydroquinate dehydratase	Cytoplasm
JC286_RS03180	NZ_CP065921.1	731584	731667	156.603	1.54384	0.509664	3.02914	0.00245253	0.0201931	Yes	JC286_RS03180	tRNA	Cytoplasm
JC286_RS05640	NZ_CP065921.1	1195866	1196882	3764.9	1.53138	0.470941	3.25173	0.00114703	0.0102687	Yes	JC286_RS05640	glyceraldehyde-3-phosphate dehydrogenase	Cytoplasm
JC286_RS01350	NZ_CP065921.1	335445	336074	126.155	1.47576	0.403453	3.65783	0.000254358	0.00271958	Yes	JC286_RS01350	class I SAM-dependent methyltransferase	Cytoplasm
JC286_RS05380	NZ_CP065921.1	1134429	1135061	314.054	1.41178	0.378151	3.73336	0.000188939	0.00206459	Yes	JC286_RS05380	GNAT family N-acetyltransferase	Cytoplasm
JC286_RS03065	NZ_CP065921.1	706065	708020	1472	1.37361	0.205147	6.69573	2.14597e-11	4.99104e-10	Yes	JC286_RS03065	sialic acid synthase	Cytoplasm
JC286_RS07960	NZ_CP065921.1	1682872	1686045	6771.06	1.33011	0.194978	6.82184	8.98824e-12	2.11224e-10	Yes	carB	carB, carbamoyl-phosphate synthase large subunit	Cytoplasm
JC286_RS10695	NZ_CP065921.1	2243732	2244526	212.534	1.32071	0.365315	3.61525	0.000300058	0.00317808	Yes	JC286_RS10695	HpcH/HpaI aldolase/citrate lyase family protein	Cytoplasm
JC286_RS11440	NZ_CP065921.1	2391672	2392229	19169.2	1.30611	0.180336	7.24262	4.4011e-13	1.09009e-11	Yes	pdxT	pyridoxal 5'-phosphate synthase glutaminase subunit PdxT	Cytoplasm
JC286_RS12210	NZ_CP065921.1	2554595	2555017	20998	1.30407	0.385461	3.38315	0.000716597	0.00679261	Yes	JC286_RS12210	general stress protein	Cytoplasm
JC286_RS05375	NZ_CP065921.1	1133258	1134415	521.523	1.25375	0.257232	4.87399	1.09366e-06	1.70211e-05	Yes	JC286_RS05375	acetoin utilization protein AcuC	Cytoplasm
JC286_RS01210	NZ_CP065921.1	302677	303678	1855.7	1.25266	0.457733	2.73665	0.00620677	0.0460608	Yes	argF	ornithine carbamoyltransferase	Cytoplasm
JC286_RS11205	NZ_CP065921.1	2341865	2342947	6458.85	1.2494	0.211169	5.9166	3.28663e-09	6.80243e-08	Yes	JC286_RS11205	branched-chain amino acid aminotransferase	Cytoplasm
JC286_RS05220	NZ_CP065921.1	1098642	1099109	861.101	1.22998	0.243934	5.04224	4.60117e-07	7.80469e-06	Yes	JC286_RS05220	6,7-dimethyl-8-ribityllumazine synthase	Cytoplasm
JC286_RS05990	NZ_CP065921.1	1267402	1268136	748.56	1.22438	0.239232	5.11795	3.08873e-07	5.44389e-06	Yes	pxpB	5-oxoprolinase subunit PxpB	Cytoplasm
JC286_RS08855	NZ_CP065921.1	1875242	1875859	1317.63	1.20707	0.249831	4.83154	1.35479e-06	2.07919e-05	Yes	JC286_RS08855	competence protein ComK	Cytoplasm
JC286_RS04355	NZ_CP065921.1	976269	976341	1107.61	1.19486	0.373577	3.19844	0.00138171	0.0120353	Yes	JC286_RS04355	tRNA	Cytoplasm
JC286_RS01500	NZ_CP065921.1	374436	374981	1369.81	1.17684	0.234438	5.01984	5.17148e-07	8.67703e-06	Yes	dcd	dCTP deaminase	Cytoplasm
JC286_RS04360	NZ_CP065921.1	976346	976427	1112.8	1.17469	0.380553	3.0868	0.00202321	0.017095	Yes	JC286_RS04360	tRNA	Cytoplasm
JC286_RS05995	NZ_CP065921.1	1268126	1269151	3059.57	1.16253	0.181675	6.39899	1.56413e-10	3.45949e-09	Yes	JC286_RS05995	biotin-dependent carboxyltransferase family protein	Cytoplasm
JC286_RS11850	NZ_CP065921.1	2477526	2478431	886.483	1.1368	0.29871	3.80571	0.000141401	0.00160301	Yes	JC286_RS11850	cysteine synthase family protein	Cytoplasm
JC286_RS11445	NZ_CP065921.1	2392231	2393118	15569.6	1.13651	0.215235	5.28034	1.28947e-07	2.42421e-06	Yes	pdxS	pyridoxal 5'-phosphate synthase lyase subunit PdxS	Cytoplasm
JC286_RS04375	NZ_CP065921.1	976618	976691	440.523	1.13394	0.32939	3.44254	0.00057627	0.00555583	Yes	JC286_RS04375	tRNA	Cytoplasm
JC286_RS01675	NZ_CP065921.1	412598	413347	297.007	1.12487	0.338744	3.32069	0.000897943	0.00833646	Yes	trpA	tryptophan synthase subunit alpha	Cytoplasm
JC286_RS07965	NZ_CP065921.1	1686038	1687138	1469.84	1.11928	0.223729	5.00284	5.64911e-07	9.16862e-06	Yes	JC286_RS07965	carbamoyl phosphate synthase small subunit	Cytoplasm
JC286_RS10225	NZ_CP065921.1	2146786	2147835	4628.61	1.09951	0.190051	5.78536	7.23562e-09	1.48396e-07	Yes	hisC	histidinol-phosphate transaminase	Cytoplasm
JC286_RS04350	NZ_CP065921.1	976189	976264	1193.47	1.0894	0.368337	2.95762	0.00310021	0.0248899	Yes	JC286_RS04350	tRNA	Cytoplasm
JC286_RS10690	NZ_CP065921.1	2242555	2243757	255.855	1.08187	0.323627	3.34295	0.000828926	0.00772751	Yes	JC286_RS10690	type III PLP-dependent enzyme	Cytoplasm
JC286_RS05365	NZ_CP065921.1	1130652	1131743	8565	1.0812	0.273496	3.95325	7.70967e-05	0.000905886	Yes	JC286_RS05365	bifunctional 3-deoxy-7-phosphoheptulonate synthase/chorismate mutase	Cytoplasm
JC286_RS03280	NZ_CP065921.1	753070	754008	8885.08	1.07196	0.326027	3.28796	0.00100915	0.00932862	Yes	manA	mannose-6-phosphate isomerase, class I	Cytoplasm
JC286_RS04370	NZ_CP065921.1	976512	976600	556.932	1.06048	0.378074	2.80495	0.00503245	0.038098	Yes	JC286_RS04370	tRNA	Cytoplasm
JC286_RS01695	NZ_CP065921.1	416302	417723	5110.06	1.04024	0.269277	3.86307	0.000111973	0.00127581	Yes	JC286_RS01695	FAD-binding protein	Cytoplasm
JC286_RS01125	NZ_CP065921.1	277091	278038	3018.56	1.02515	0.237546	4.31558	1.59183e-05	0.000206388	Yes	JC286_RS01125	nucleoside hydrolase	Cytoplasm
JC286_RS03940	NZ_CP065921.1	887809	888366	3417.76	1.01655	0.215642	4.71407	2.42814e-06	3.62774e-05	Yes	JC286_RS03940	thioredoxin family protein	Cytoplasm
JC286_RS00590	NZ_CP065921.1	134407	135450	57828.7	-1.02631	0.273818	-3.74814	0.00017815	0.00198963	Yes	JC286_RS00590	zinc-dependent alcohol dehydrogenase family protein	Cytoplasm
JC286_RS05595	NZ_CP065921.1	1182449	1183417	23778.8	-1.04485	0.258593	-4.04054	5.3329e-05	0.000650325	Yes	pfkA	6-phosphofructokinase	Cytoplasm
JC286_RS01055	NZ_CP065921.1	255469	256359	37600.6	-1.04735	0.211654	-4.94839	7.48291e-07	1.19727e-05	Yes	JC286_RS01055	fructose bisphosphate aldolase	Cytoplasm
JC286_RS09975	NZ_CP065921.1	2089906	2090943	96068.1	-1.04976	0.164596	-6.37782	1.7963e-10	3.93441e-09	Yes	JC286_RS09975	hypothetical protein	Cytoplasm
JC286_RS05600	NZ_CP065921.1	1183436	1185196	34668.2	-1.0562	0.237109	-4.45448	8.40949e-06	0.000114981	Yes	pyk	pyruvate kinase	Cytoplasm
JC286_RS11085	NZ_CP065921.1	2318791	2319477	12400.5	-1.08706	0.189208	-5.74534	9.17379e-09	1.84786e-07	Yes	JC286_RS11085	2,3-diphosphoglycerate-dependent phosphoglycerate mutase	Cytoplasm
JC286_RS00980	NZ_CP065921.1	236924	237610	161438	-1.15215	0.178358	-6.45974	1.0488e-10	2.3661e-09	Yes	JC286_RS00980	response regulator transcription factor	Cytoplasm
JC286_RS03690	NZ_CP065921.1	832581	835502	659.107	-1.20875	0.34525	-3.50109	0.000463363	0.00462543	Yes	JC286_RS03690	23S ribosomal RNA	Cytoplasm
JC286_RS09640	NZ_CP065921.1	2029673	2030050	3154.87	-1.23671	0.237692	-5.20297	1.96124e-07	3.53965e-06	Yes	JC286_RS09640	PaaI family thioesterase	Cytoplasm
JC286_RS09970	NZ_CP065921.1	2088836	2089843	75357.3	-1.23883	0.186528	-6.64151	3.10485e-11	7.1475e-10	Yes	gap	type I glyceraldehyde-3-phosphate dehydrogenase	Cytoplasm
JC286_RS01200	NZ_CP065921.1	299012	300505	756.642	-1.2605	0.223387	-5.64267	1.67435e-08	3.31346e-07	Yes	betB	betaine-aldehyde dehydrogenase	Cytoplasm
JC286_RS08625	NZ_CP065921.1	1819757	1820902	10506.7	-1.38504	0.187927	-7.37012	1.7047e-13	4.27312e-12	Yes	JC286_RS08625	globin domain-containing protein	Cytoplasm
JC286_RS00575	NZ_CP065921.1	132325	133092	2502.26	-1.39987	0.297653	-4.70301	2.56357e-06	3.80488e-05	Yes	JC286_RS00575	IclR family transcriptional regulator	Cytoplasm
JC286_RS02005	NZ_CP065921.1	496113	496763	13472	-1.49304	0.237269	-6.29259	3.12222e-10	6.77281e-09	Yes	nreC	nreC, nitrate respiration regulation response regulator NreC	Cytoplasm
JC286_RS07415	NZ_CP065921.1	1558383	1560143	16593.7	-1.5046	0.422214	-3.56359	0.000365822	0.00378575	Yes	JC286_RS07415	2-oxoacid:acceptor oxidoreductase subunit alpha	Cytoplasm
JC286_RS01760	NZ_CP065921.1	436369	437043	1372.35	-1.65276	0.204085	-8.09837	5.57022e-16	1.53249e-14	Yes	scdA	scdA, iron-sulfur cluster repair di-iron protein ScdA	Cytoplasm
JC286_RS01995	NZ_CP065921.1	494599	495060	17906.4	-1.68073	0.182121	-9.22867	2.74019e-20	9.36648e-19	Yes	nreA	nreA, nitrate respiration regulation accessory nitrate sensor NreA, GAF domain-containing protein	Cytoplasm
JC286_RS01920	NZ_CP065921.1	474717	475457	3264.35	-2.32279	0.19685	-11.7998	3.91258e-32	2.52193e-30	Yes	JC286_RS01920	sirohydrochlorin chelatase	Cytoplasm
JC286_RS00200	NZ_CP065921.1	44491	45606	13842.7	-2.41032	0.317797	-7.58447	3.33843e-14	8.55852e-13	Yes	JC286_RS00200	alanine dehydrogenase	Cytoplasm
JC286_RS01855	NZ_CP065921.1	459953	460630	1781.69	-2.55255	0.201877	-12.6441	1.20557e-36	9.37851e-35	Yes	sdaAB	sdaAB, L-serine ammonia-lyase, iron-sulfur-dependent subunit beta	Cytoplasm
JC286_RS01930	NZ_CP065921.1	475893	478298	16774.3	-2.56919	0.17478	-14.6996	6.48765e-49	9.14758e-47	Yes	JC286_RS01930	nirB, nitrite reductase large subunit NirB	Cytoplasm
JC286_RS01940	NZ_CP065921.1	478605	479552	22104.2	-2.82698	0.184329	-15.3366	4.35625e-53	7.01978e-51	Yes	cobA	cobA, uroporphyrinogen-III C-methyltransferase	Cytoplasm
JC286_RS01935	NZ_CP065921.1	478303	478617	9208.87	-2.84757	0.201976	-14.0986	3.873e-45	4.59867e-43	Yes	nirD	nirD,nitrite reductase small subunit NirD	Cytoplasm
JC286_RS01985	NZ_CP065921.1	493338	493913	13728.5	-3.33267	0.209081	-15.9396	3.36321e-57	6.89763e-55	Yes	JC286_RS01985	molecular chaperone TorD family protein	Cytoplasm
JC286_RS00680	NZ_CP065921.1	153331	154758	1611.51	-4.0933	0.22122	-18.5033	1.94056e-76	5.47238e-74	Yes	JC286_RS00680	aminotransferase class V-fold PLP-dependent enzyme	Cytoplasm
JC286_RS00910	NZ_CP065921.1	217697	218437	86.407	3.31836	0.538144	6.16631	6.99014e-10	1.48771e-08	Yes	JC286_RS00910	ABC transporter ATP-binding protein	Cytoplasmic membrane
JC286_RS02140	NZ_CP065921.1	531041	532105	2235.81	3.83974	0.242106	15.8597	1.2039e-56	2.26334e-54	Yes	JC286_RS02140	FtsX-like permease family protein	Cytoplasmic membrane
JC286_RS02145	NZ_CP065921.1	532102	532791	1869.43	3.53695	0.249361	14.1841	1.14943e-45	1.44062e-43	Yes	JC286_RS02145	ABC transporter ATP-binding protein	Cytoplasmic membrane
JC286_RS12280	NZ_CP065921.1	2569304	2570329	443.295	3.39848	0.362033	9.3872	6.16173e-21	2.17201e-19	Yes	JC286_RS12280	methionine ABC transporter ATP-binding protein	Cytoplasmic membrane
JC286_RS10545	NZ_CP065921.1	2210787	2211548	1701.67	3.0663	0.202828	15.1177	1.23786e-51	1.86175e-49	Yes	JC286_RS10545	ABC transporter ATP-binding protein	Cytoplasmic membrane
JC286_RS01835	NZ_CP065921.1	456210	457172	3367.39	3.0364	0.228762	13.2732	3.31232e-40	3.39663e-38	Yes	JC286_RS01835	ABC transporter permease	Cytoplasmic membrane
JC286_RS01830	NZ_CP065921.1	455227	456213	5407.13	3.01939	0.210519	14.3426	1.18536e-46	1.57304e-44	Yes	JC286_RS01830	ATP-binding cassette domain-containing protein	Cytoplasmic membrane
JC286_RS01825	NZ_CP065921.1	454224	455234	6325.24	2.93778	0.234423	12.532	4.99035e-36	3.5182e-34	Yes	JC286_RS01825	ABC transporter ATP-binding protein	Cytoplasmic membrane
JC286_RS01840	NZ_CP065921.1	457184	458077	4866.11	2.87073	0.224329	12.797	1.70398e-37	1.37292e-35	Yes	JC286_RS01840	ABC transporter permease	Cytoplasmic membrane
JC286_RS12285	NZ_CP065921.1	2570323	2570982	302.2	2.86532	0.357727	8.0098	1.14893e-15	3.04939e-14	Yes	JC286_RS12285	ABC transporter permease	Cytoplasmic membrane
JC286_RS10540	NZ_CP065921.1	2208899	2210797	2524.16	2.77547	0.241946	11.4714	1.83598e-30	1.11945e-28	Yes	JC286_RS10540	ABC transporter permease	Cytoplasmic membrane
JC286_RS10940	NZ_CP065921.1	2291613	2292218	2427.36	2.61379	0.201202	12.9909	1.3786e-38	1.24405e-36	Yes	JC286_RS10940	DUF2812 domain-containing protein	Cytoplasmic membrane
JC286_RS12290	NZ_CP065921.1	2570998	2571837	607.957	2.60949	0.29118	8.96178	3.19467e-19	9.87284e-18	Yes	gmpC	dipeptide ABC transporter glycylmethionine-binding lipoprotein	Cytoplasmic membrane
JC286_RS01805	NZ_CP065921.1	449312	450301	1043.88	2.57165	0.231395	11.1137	1.07644e-28	5.78203e-27	Yes	JC286_RS01805	dipeptide ABC transporter ATP-binding protein	Cytoplasmic membrane
JC286_RS10715	NZ_CP065921.1	2249200	2250975	243.74	2.51868	0.3828	6.57963	4.71619e-11	1.07472e-09	Yes	sbnC	staphyloferrin B biosynthesis protein SbnC	Cytoplasmic membrane
JC286_RS00900	NZ_CP065921.1	215966	216730	550.468	2.51471	0.257386	9.7702	1.51152e-22	5.98243e-21	Yes	JC286_RS00900	ABC transporter permease	Cytoplasmic membrane
JC286_RS09400	NZ_CP065921.1	1974841	1975782	27526.3	2.30331	0.166692	13.8177	1.99287e-43	2.24795e-41	Yes	JC286_RS09400	ATP-binding cassette domain-containing protein	Cytoplasmic membrane
JC286_RS09405	NZ_CP065921.1	1975775	1976854	38136.2	2.21207	0.208072	10.6313	2.13178e-26	1.09302e-24	Yes	JC286_RS09405	ABC transporter ATP-binding protein	Cytoplasmic membrane
JC286_RS09410	NZ_CP065921.1	1976869	1977930	26174.6	1.98952	0.177345	11.2183	3.31433e-29	1.82369e-27	Yes	JC286_RS09410	ABC transporter permease	Cytoplasmic membrane
JC286_RS09415	NZ_CP065921.1	1977930	1978856	12896.4	1.88755	0.187114	10.0877	6.26278e-24	2.71708e-22	Yes	JC286_RS09415	ABC transporter permease	Cytoplasmic membrane
JC286_RS10710	NZ_CP065921.1	2247966	2249228	195.277	1.78014	0.440484	4.04134	5.31475e-05	0.000650325	Yes	JC286_RS10710	MFS transporter	Cytoplasmic membrane
JC286_RS01410	NZ_CP065921.1	353761	355260	3759.25	1.72135	0.197157	8.73085	2.52777e-18	7.50347e-17	Yes	JC286_RS01410	tripartite tricarboxylate transporter permease	Cytoplasmic membrane
JC286_RS09280	NZ_CP065921.1	1945648	1947219	4513.78	1.64827	0.19217	8.57713	9.72711e-18	2.84992e-16	Yes	JC286_RS09280	alanine:cation symporter family protein	Cytoplasmic membrane
JC286_RS03085	NZ_CP065921.1	712247	713191	7528.35	1.64565	0.227809	7.22383	5.0544e-13	1.2261e-11	Yes	JC286_RS03085	Fe(3+) dicitrate ABC transporter substrate-binding protein	Cytoplasmic membrane
JC286_RS11800	NZ_CP065921.1	2462847	2467352	14609.9	1.56706	0.445541	3.5172	0.000436123	0.00440348	Yes	gltB	glutamate synthase large subunit	Cytoplasmic membrane
JC286_RS09825	NZ_CP065921.1	2062497	2063042	1743.32	1.55591	0.381202	4.08159	4.4728e-05	0.000554431	Yes	JC286_RS09825	nitroreductase	Cytoplasmic membrane
JC286_RS02520	NZ_CP065921.1	605313	606236	360.916	1.54614	0.446621	3.46186	0.000536461	0.0052392	Yes	JC286_RS02520	ABC transporter substrate-binding protein	Cytoplasmic membrane
JC286_RS05665	NZ_CP065921.1	1202470	1203978	20477.8	1.48674	0.168917	8.80162	1.34852e-18	4.11118e-17	Yes	JC286_RS05665	amino acid permease	Cytoplasmic membrane
JC286_RS01415	NZ_CP065921.1	355273	355716	454.233	1.48455	0.319147	4.65162	3.2934e-06	4.73243e-05	Yes	JC286_RS01415	tripartite tricarboxylate transporter TctB family protein	Cytoplasmic membrane
JC286_RS03090	NZ_CP065921.1	713335	714360	1195.93	1.42804	0.279421	5.11069	3.20976e-07	5.61335e-06	Yes	JC286_RS03090	iron ABC transporter permease	Cytoplasmic membrane
JC286_RS02415	NZ_CP065921.1	583620	584327	691.217	1.35572	0.257403	5.26692	1.38733e-07	2.58662e-06	Yes	JC286_RS02415	DUF969 domain-containing protein	Cytoplasmic membrane
JC286_RS10740	NZ_CP065921.1	2255205	2256203	1579.58	1.32289	0.289523	4.56921	4.89565e-06	6.94628e-05	Yes	JC286_RS10740	iron ABC transporter permease	Cytoplasmic membrane
JC286_RS01740	NZ_CP065921.1	432196	433461	2827.82	1.30734	0.349718	3.73828	0.000185285	0.00203904	Yes	JC286_RS01740	MFS transporter	Cytoplasmic membrane
JC286_RS04100	NZ_CP065921.1	924246	925436	602.817	1.29105	0.26489	4.87393	1.094e-06	1.70211e-05	Yes	JC286_RS04100	MFS transporter	Cytoplasmic membrane
JC286_RS01845	NZ_CP065921.1	458395	458652	560.505	1.28812	0.284618	4.52578	6.01741e-06	8.43185e-05	Yes	JC286_RS01845	hypothetical protein	Cytoplasmic membrane
JC286_RS10735	NZ_CP065921.1	2254213	2255208	2456.85	1.25934	0.250985	5.01758	5.23262e-07	8.67999e-06	Yes	JC286_RS10735	iron ABC transporter permease	Cytoplasmic membrane
JC286_RS11220	NZ_CP065921.1	2343971	2345227	240.28	1.22141	0.415697	2.93821	0.00330109	0.0262227	Yes	JC286_RS11220	MFS transporter	Cytoplasmic membrane
JC286_RS01700	NZ_CP065921.1	417713	418993	5748.78	1.21347	0.230565	5.26301	1.41718e-07	2.59932e-06	Yes	JC286_RS01700	(Fe-S)-binding protein	Cytoplasmic membrane
JC286_RS04540	NZ_CP065921.1	987476	988936	2229.6	1.16591	0.325893	3.5776	0.000346766	0.00363863	Yes	JC286_RS04540	ABC transporter substrate-binding protein/permease	Cytoplasmic membrane
JC286_RS10730	NZ_CP065921.1	2253213	2254196	4339.15	1.15895	0.189348	6.12075	9.31365e-10	1.9637e-08	Yes	JC286_RS10730	iron-siderophore ABC transporter substrate-binding protein	Cytoplasmic membrane
JC286_RS02305	NZ_CP065921.1	562303	563607	29149.9	1.15153	0.278707	4.13169	3.601e-05	0.000453846	Yes	JC286_RS02305	YjiH family protein	Cytoplasmic membrane
JC286_RS02385	NZ_CP065921.1	577495	578883	15678.2	1.14478	0.275695	4.15233	3.29101e-05	0.000417107	Yes	JC286_RS02385	amino acid permease	Cytoplasmic membrane
JC286_RS10700	NZ_CP065921.1	2244523	2246277	278.089	1.118	0.332335	3.36406	0.000768036	0.00721954	Yes	sbnF	staphyloferrin B biosynthesis protein SbnF	Cytoplasmic membrane
JC286_RS01755	NZ_CP065921.1	435764	436297	618.45	1.07372	0.30804	3.48565	0.000490936	0.00485769	Yes	JC286_RS01755	hypothetical protein	Cytoplasmic membrane
JC286_RS04545	NZ_CP065921.1	988929	989654	1142.67	1.06121	0.346941	3.05875	0.00222261	0.0186402	Yes	JC286_RS04545	amino acid ABC transporter ATP-binding protein	Cytoplasmic membrane
JC286_RS10950	NZ_CP065921.1	2292687	2294228	2182.17	1.05943	0.263831	4.01555	5.93068e-05	0.000719334	Yes	JC286_RS10950	SLC13 family permease	Cytoplasmic membrane
JC286_RS03095	NZ_CP065921.1	714357	715319	2375.8	1.00114	0.231135	4.33138	1.48178e-05	0.000194354	Yes	JC286_RS03095	iron chelate uptake ABC transporter family permease subunit	Cytoplasmic membrane
JC286_RS01550	NZ_CP065921.1	384372	385058	3217.56	-1.01954	0.194804	-5.23366	1.6619e-07	3.02359e-06	Yes	JC286_RS01550	LrgB family protein	Cytoplasmic membrane
JC286_RS07100	NZ_CP065921.1	1486392	1488431	19637.2	-1.0821	0.190346	-5.68491	1.30878e-08	2.61293e-07	Yes	JC286_RS07100	glucose-specific PTS transporter subunit IIBC	Cytoplasmic membrane
JC286_RS00570	NZ_CP065921.1	130936	132294	10150	-1.09278	0.203904	-5.35925	8.35672e-08	1.59769e-06	Yes	JC286_RS00570	arginine transporter	Cytoplasmic membrane
JC286_RS01205	NZ_CP065921.1	300633	302327	1055.04	-1.09575	0.208189	-5.26322	1.4155e-07	2.59932e-06	Yes	betA	betA, choline dehydrogenase	Cytoplasmic membrane
JC286_RS02380	NZ_CP065921.1	576286	577128	237.844	-1.1067	0.323823	-3.41761	0.00063174	0.00606471	Yes	JC286_RS02380	formate/nitrite transporter family protein	Cytoplasmic membrane
JC286_RS09645	NZ_CP065921.1	2030074	2031387	9835.69	-1.12313	0.223773	-5.01906	5.19237e-07	8.67703e-06	Yes	JC286_RS09645	Na+/H+ antiporter family protein	Cytoplasmic membrane
JC286_RS01105	NZ_CP065921.1	269402	270709	5880.92	-1.18887	0.216115	-5.5011	3.7743e-08	7.33185e-07	Yes	JC286_RS01105	anaerobic C4-dicarboxylate transporter family protein	Cytoplasmic membrane
JC286_RS00985	NZ_CP065921.1	237611	238645	129366	-1.21357	0.195121	-6.21961	4.98398e-10	1.07084e-08	Yes	JC286_RS00985	HAMP domain-containing histidine kinase	Cytoplasmic membrane
JC286_RS01050	NZ_CP065921.1	253323	254978	632.75	-1.27665	0.310516	-4.11138	3.93301e-05	0.000492938	Yes	adcA	zinc ABC transporter substrate-binding lipoprotein AdcA	Cytoplasmic membrane
JC286_RS04245	NZ_CP065921.1	953298	954095	604.061	-1.3258	0.295276	-4.49004	7.12115e-06	9.85602e-05	Yes	sgtB	monofunctional peptidoglycan glycosyltransferase SgtB	Cytoplasmic membrane
JC286_RS02000	NZ_CP065921.1	495060	496094	25876.3	-1.54193	0.183986	-8.38072	5.26068e-17	1.48351e-15	Yes	JC286_RS02000	sensor histidine kinase	Cytoplasmic membrane
JC286_RS00775	NZ_CP065921.1	175863	176357	191.13	-1.54988	0.39504	-3.92336	8.7324e-05	0.00101548	Yes	JC286_RS00775	membrane protein	Cytoplasmic membrane
JC286_RS01990	NZ_CP065921.1	493906	494583	14345.5	-2.44845	0.214335	-11.4235	3.19195e-30	1.84642e-28	Yes	narI	respiratory nitrate reductase subunit gamma	Cytoplasmic membrane
JC286_RS01860	NZ_CP065921.1	460645	461676	2019.7	-2.51148	0.20865	-12.0368	2.27647e-33	1.51051e-31	Yes	JC286_RS01860	PTS sugar transporter subunit IIC	Cytoplasmic membrane
JC286_RS00210	NZ_CP065921.1	46716	48038	18883	-2.6071	0.226075	-11.532	9.09608e-31	5.70021e-29	Yes	JC286_RS00210	amino acid permease	Cytoplasmic membrane
JC286_RS01975	NZ_CP065921.1	488128	491799	51648.9	-2.8258	0.172695	-16.3629	3.51684e-60	7.934e-58	Yes	JC286_RS01975	nitrate reductase subunit alpha	Cytoplasmic membrane
JC286_RS02010	NZ_CP065921.1	497822	499000	8803.07	-3.10866	0.34089	-9.11925	7.56492e-20	2.50977e-18	Yes	JC286_RS02010	NarK/NasA family nitrate transporter	Cytoplasmic membrane
JC286_RS01980	NZ_CP065921.1	491789	493345	30072.9	-3.28106	0.186394	-17.6028	2.34628e-69	5.88134e-67	Yes	narH	narH, nitrate reductase subunit beta	Cytoplasmic membrane
JC286_RS01465	NZ_CP065921.1	364457	366544	9068.13	1.75137	0.170145	10.2934	7.54768e-25	3.40551e-23	Yes	JC286_RS01465	YSIRK-type signal peptide-containing protein	Extracellular
JC286_RS05055	NZ_CP065921.1	1068310	1069290	15279.4	-1.67767	0.224373	-7.47715	7.59532e-14	1.92529e-12	Yes	JC286_RS05055	leukocidin/hemolysin toxin family protein	Extracellular
JC286_RS02490	NZ_CP065921.1	599282	600010	717.799	-1.68113	0.303769	-5.53422	3.12608e-08	6.13255e-07	Yes	JC286_RS02490	CHAP domain-containing protein	Extracellular
JC286_RS11200	NZ_CP065921.1	2340163	2341155	3948.16	-1.75169	0.242667	-7.21851	5.25588e-13	1.26141e-11	Yes	sph	sphingomyelin phosphodiesterase	Extracellular
JC286_RS01585	NZ_CP065921.1	390425	391132	2307.56	-1.94414	0.214668	-9.0565	1.34699e-19	4.40407e-18	Yes	JC286_RS01585	hypothetical protein	Extracellular
JC286_RS05060	NZ_CP065921.1	1069292	1070224	4032.05	-1.95581	0.200777	-9.74119	2.01182e-22	7.69265e-21	Yes	JC286_RS05060	beta-channel forming cytolysin, Leukocidin	Extracellular
JC286_RS11935	NZ_CP065921.1	2498322	2499026	761.188	-2.53174	0.306928	-8.24864	1.60213e-16	4.46222e-15	Yes	JC286_RS11935	exotoxin SpEX	Extracellular
JC286_RS11930	NZ_CP065921.1	2496620	2498128	306.517	-2.88497	0.562023	-5.13318	2.84889e-07	5.06071e-06	Yes	JC286_RS11930	coagulase	Extracellular
JC286_RS03730	NZ_CP065921.1	837335	838603	417.82	3.13411	0.315916	9.92073	3.38286e-23	1.41328e-21	Yes	ilvA	threonine ammonia-lyase IlvA	Unknown
JC286_RS00895	NZ_CP065921.1	214903	215946	802.259	2.40518	0.265656	9.05373	1.3816e-19	4.4527e-18	Yes	JC286_RS00895	acyl-CoA/acyl-ACP dehydrogenase	Unknown
JC286_RS00885	NZ_CP065921.1	211527	213098	3637.55	2.35423	0.241891	9.73262	2.1888e-22	8.22988e-21	Yes	JC286_RS00885	acyl CoA:acetate/3-ketoacid CoA transferase	Unknown
JC286_RS00870	NZ_CP065921.1	206440	208701	2093.45	2.32394	0.242287	9.5917	8.66491e-22	3.2046e-20	Yes	JC286_RS00870	3-hydroxyacyl-CoA dehydrogenase/enoyl-CoA hydratase family protein	Unknown
JC286_RS07240	NZ_CP065921.1	1520563	1521846	5097.21	1.85984	0.182823	10.1729	2.61915e-24	1.15859e-22	Yes	JC286_RS07240	homoserine dehydrogenase	Unknown
JC286_RS01420	NZ_CP065921.1	355735	356724	1213.28	1.46391	0.284961	5.13723	2.78816e-07	4.99213e-06	Yes	JC286_RS01420	tripartite tricarboxylate transporter substrate binding protein	Unknown
JC286_RS08850	NZ_CP065921.1	1874787	1875005	722.654	1.31366	0.402135	3.2667	0.00108808	0.00989801	Yes	JC286_RS08850	IDEAL domain-containing protein	Unknown
JC286_RS06000	NZ_CP065921.1	1269142	1269588	2090.61	1.0019	0.215144	4.65686	3.21062e-06	4.64305e-05	Yes	JC286_RS06000	acetyl-CoA carboxylase biotin carboxyl carrier protein subunit	Unknown
JC286_RS00970	NZ_CP065921.1	235996	236448	123692	-1.13118	0.235894	-4.79527	1.62454e-06	2.4597e-05	Yes	JC286_RS00970	DM13 domain-containing protein	Unknown
JC286_RS01685	NZ_CP065921.1	414634	415362	149.402	-1.22342	0.438354	-2.79095	0.0052554	0.0395206	Yes	JC286_RS01685	serine protease	Unknown
JC286_RS03950	NZ_CP065921.1	889106	889948	1099.6	-1.46471	0.26632	-5.49979	3.80242e-08	7.33185e-07	Yes	JC286_RS03950	DUF4097 family beta strand repeat-containing protein	Unknown
JC286_RS08630	NZ_CP065921.1	1821130	1821465	378.405	-1.56024	0.291605	-5.35051	8.77064e-08	1.66274e-06	Yes	JC286_RS08630	DUF5011 domain-containing protein	Unknown
JC286_RS09190	NZ_CP065921.1	1924176	1924304	66.4657	-1.81966	0.582091	-3.12607	0.00177159	0.0150819	Yes	JC286_RS09190	teichoic acid D-Ala incorporation-associated protein DltX	Unknown
JC286_RS01850	NZ_CP065921.1	459038	459937	6992.66	-2.13359	0.199623	-10.6881	1.15682e-26	6.06927e-25	Yes	sdaAA	L-serine ammonia-lyase, iron-sulfur-dependent, subunit alpha	Unknown
JC286_RS01925	NZ_CP065921.1	475439	475900	1927.37	-2.53006	0.201369	-12.5643	3.31726e-36	2.41411e-34	Yes	JC286_RS01925	siroheme synthase	Unknown
JC286_RS00205	NZ_CP065921.1	45643	46683	12203.5	-2.61701	0.3297	-7.93755	2.06217e-15	5.40961e-14	Yes	tdcB	tdcB, bifunctional threonine ammonia-lyase/L-serine ammonia-lyase TdcB	Unknown
